# Supplementary material for: 2nd to 5th Carpometacarpal joint dislocation combined with extensor carpi radialis longus tendon stop rupture: a case report and literature review
Source: Research Square preprint supplement (doi:10.21203/rs.3.rs-6726639/v1), 2025-06-11
Supplement: Supplementary file 1 [file b6d568d62b4f24529c931b17.pdf]

THE

DASH

## 上肢功能受損程度問卷

說明：

本問卷的內容會問及有關你的病癥，  
以及你進行某些活動的能力。

請根據你過去一星期內的情況，就下列每一條問題，圈出最適合的數字作答。

如果你過去一星期內，沒有機會進行該項活動，請估計你進行該項活動的能力，並選取最適合的答案。

你只需要考慮你進行該項活動的能力去選取答案，而不必理會你是用那一隻手或手臂去進行。

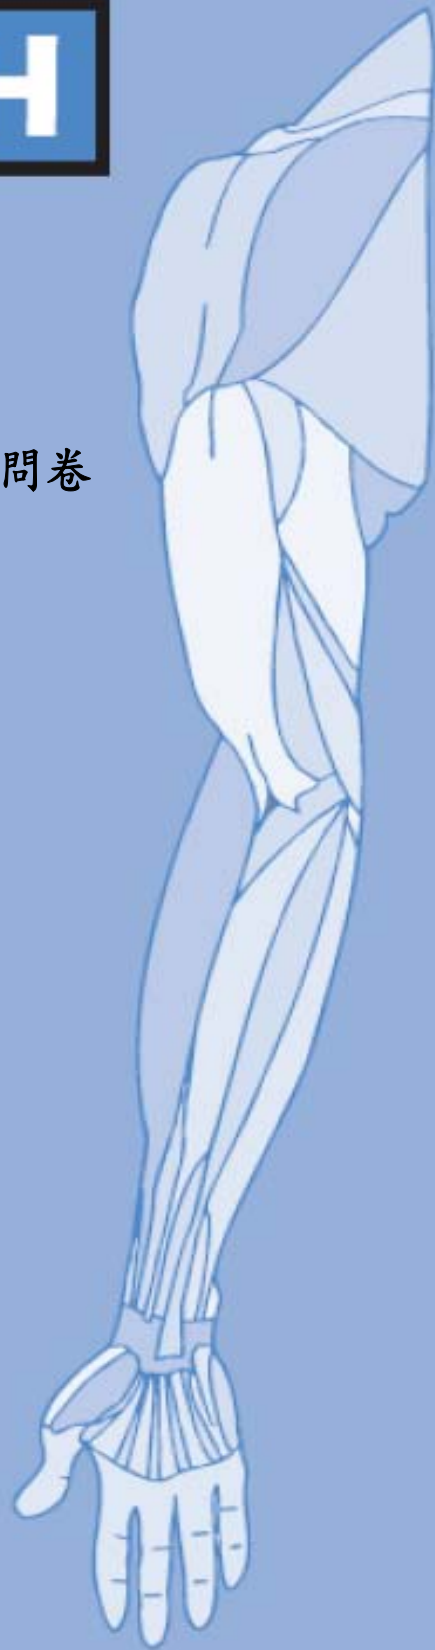

CHINESE DASH (QMH, HK, Version)

**上肢功能受損程度問卷**  
**Chinese (QMH, HK, Version) Disability of Arm, Shoulder and Hand**

**第一部份：活動能力**

請評估你過去一星期內，進行下列活動的能力，並圈出最適合的數字作答。

|                                                                              | 沒有困難 | 少許困難 | 中度困難 | 非常困難 | 不能做到 |
|------------------------------------------------------------------------------|------|------|------|------|------|
| 1. 扭開緊或新的瓶蓋                                                                  | 1 ✓  | 2    | 3    | 4    | 5    |
| 2. 寫字                                                                        | 1 ✓  | 2    | 3    | 4    | 5    |
| 3. 扭動鑰匙                                                                      | 1 ✓  | 2    | 3    | 4    | 5    |
| 4. 預備飯餐 / 煮食                                                                 | 1 ✓  | 2    | 3    | 4    | 5    |
| 5. 推開重的門                                                                     | 1    | 2 ✓  | 3    | 4    | 5    |
| 6. 將物件擺放在高過頭頂的架上                                                             | 1 ✓  | 2    | 3    | 4    | 5    |
| 7. 做消耗大量體力的家務<br>(例如：抹窗或洗擦地板)                                                | 1    | 2 ✓  | 3    | 4    | 5    |
| 8. 園藝或種植                                                                     | 1 ✓  | 2    | 3    | 4    | 5    |
| 9. 整理床鋪                                                                      | 1 ✓  | 2    | 3    | 4    | 5    |
| 10. 攜帶購物袋或公事包                                                                | 1 ✓  | 2    | 3    | 4    | 5    |
| 11. 攜帶重物 (超過 10 磅)                                                           | 1    | 2 ✓  | 3    | 4    | 5    |
| 12. 更換高過頭頂的燈泡                                                                | 1 ✓  | 2    | 3    | 4    | 5    |
| 13. 清洗或吹乾頭髮                                                                  | 1 ✓  | 2    | 3    | 4    | 5    |
| 14. 清洗背部                                                                     | 1 ✓  | 2    | 3    | 4    | 5    |
| 15. 穿著過頭衣物                                                                   | 1 ✓  | 2    | 3    | 4    | 5    |
| 16. 用刀切食物                                                                    | 1 ✓  | 2    | 3    | 4    | 5    |
| 17. 進行一些需要較少體力的餘閒活動<br>(例如：玩紙牌遊戲，編織等)                                        | 1 ✓  | 2    | 3    | 4    | 5    |
| 18. 進行一些需要上肢 (包括肩膊、<br>手臂或手部) 發力或承受衝力的<br>餘閒活動<br>(例如：打高爾夫球、打排球、<br>打網球、錘擊等) | 1    | 2 ✓  | 3    | 4    | 5    |
| 19. 進行一些需要手臂自由活動的<br>餘閒活動<br>(例如：玩飛碟、打羽毛球等)                                  | 1 ✓  | 2    | 3    | 4    | 5    |
| 20. 乘搭交通工具從一處地方到另<br>一處地方                                                    | 1 ✓  | 2    | 3    | 4    | 5    |
| 21. 進行性行為                                                                    | 1 ✓  | 2    | 3    | 4    | 5    |

**上肢功能受損程度問卷**  
**Chinese (QMH, HK, Version) Disability of Arm, Shoulder and Hand**

|                                                          | 完全沒有 | 少許 | 中度 | 相當大程度 | 極度 |
|----------------------------------------------------------|------|----|----|-------|----|
| 22. 過去一星期內，因為你肩膊、手臂或手部的問題而影響你和家人、朋友、鄰居或團體的正常社交活動，其程度有多大？ | 1 ✓  | 2  | 3  | 4     | 5  |

|                                               | 完全沒有限制 | 少許限制 | 中度限制 | 非常受限制 | 不能做到 |
|-----------------------------------------------|--------|------|------|-------|------|
| 23. 過去一星期內，你的工作或其他日常活動，有沒有因你肩膊、手臂或手部的問題而受到限制？ | 1 ✓    | 2    | 3    | 4     | 5    |

**第二部份：病癥嚴重程度**

請根據你過去一星期內，以下病癥的嚴重程度，圈出最適合的數字作答。

|                             | 沒有  | 輕微 | 中度 | 嚴重 | 極度 |
|-----------------------------|-----|----|----|----|----|
| 24. 肩膊、手臂或手部感到痛楚            | 1 ✓ | 2  | 3  | 4  | 5  |
| 25. 從事某些特定的活動時，肩膊、手臂或手部感到痛楚 | 1 ✓ | 2  | 3  | 4  | 5  |
| 26. 肩膊、手臂或手部有被針刺的感覺         | 1 ✓ | 2  | 3  | 4  | 5  |
| 27. 肩膊、手臂或手部軟弱無力            | 1 ✓ | 2  | 3  | 4  | 5  |
| 28. 肩膊、手臂或手部僵硬              | 1 ✓ | 2  | 3  | 4  | 5  |

|                                          | 沒有困難 | 少許困難 | 中度困難 | 非常困難 | 困難至不能入睡 |
|------------------------------------------|------|------|------|------|---------|
| 29. 過去一星期內，由於你肩膊、手臂或手部的痛楚而引致睡眠困難，其程度有多大？ | 1 ✓  | 2    | 3    | 4    | 5       |

|                                             | 非常不同意 | 不同意 | 並非同意或不同意 | 同意 | 非常同意 |
|---------------------------------------------|-------|-----|----------|----|------|
| 30. 由於肩膊、手臂或手部的問題，我覺得自己的辦事能力、自信心或效率，比較以前為低。 | 1 ✓   | 2   | 3        | 4  | 5    |

**上肢功能受損程度問卷**  
**Chinese (QMH, HK, Version) Disability of Arm, Shoulder and Hand**

**第三部份：工作能力**

以下問題會問及你肩膊、手臂或手部的問題對你工作能力的影響

(如你的主要職責是做家務，請包括在內)。請註明你的職業：\_\_\_\_\_

☒ 我一向沒有工作 (可略過此部分)

過去一星期內，在下列情況，你有沒有遇到困難？請圈出最能形容你的能力的數字。

|                               | 沒有困難 | 少許困難 | 中度困難 | 非常困難 | 不能做到 |
|-------------------------------|------|------|------|------|------|
| 1. 以慣常的技巧和方法工作，困難有多大？         | 1    | 2    | 3    | 4    | 5    |
| 2. 由於肩膊、手臂或手部痛楚，做日常工作時的困難有多大？ | 1    | 2    | 3    | 4    | 5    |
| 3. 工作時，要達致你想做到的一樣，困難有多大？      | 1    | 2    | 3    | 4    | 5    |
| 4. 用你平常所需要的時間去完成工作，困難有多大？     | 1    | 2    | 3    | 4    | 5    |

**第四部份：高技巧的體育活動或音樂彈奏**

以下內容會問及關於你肩膊、手臂或手部的問題，對你彈奏樂器或/及進行體育活動的影響。如你彈奏的樂器或參與的體育活動多於一項，請選擇你覺得**最重要的活動**作答。

請註明你覺得最重要的運動或樂器：\_\_\_\_\_

☒ 我一向沒有參加體育活動或彈奏樂器 (可略過此部分)

過去一星期內，在下列情況，你有沒有遇到困難？請圈出最能形容你的能力的數字。

|                                               | 沒有困難 | 少許困難 | 中度困難 | 非常困難 | 不能做到 |
|-----------------------------------------------|------|------|------|------|------|
| 1. 以慣常的技巧彈奏樂器或進行體育活動，困難有多大？                   | 1    | 2    | 3    | 4    | 5    |
| 2. 彈奏慣用的樂器或進行慣常的體育活動時，因為肩膊、手臂或手部痛楚，而引致的困難有多大？ | 1    | 2    | 3    | 4    | 5    |
| 3. 彈奏慣用的樂器或進行慣常的體育活動時，要達致你想做到的一樣，困難有多大？       | 1    | 2    | 3    | 4    | 5    |
| 4. 用你平常所需要的時間去練習樂器或進行體育活動，困難有多大？              | 1    | 2    | 3    | 4    | 5    |
